# Supplementary material for: Vitamin D Status, Muscle Strength and Physical Performance Decline in Very Old Adults: A Prospective Study
Source: Nutrients. 2017 Apr 13;9(4):379. doi: 10.3390/nu9040379 (PMC5409718; doi:10.3390/nu9040379)
Supplement: Supplementary file 1 [file nutrients-09-00379-s001.docx]

**Supplementary Materials**

**1. Supplementary Methods**

*1.1. Serum 25(OH)D Assay*

Serum 25-hydroxyvitamin D (25(OH)D) concentration was determined by DiaSorin Radioimmune Assay (RIA) kit (DiaSorin Corporation, Stillwater, MN). The kit extracts 25-hydroxy-ergocalciferol (25(OH)D2), 25-hydroxy-cholecalciferol (25(OH)D3), and other hydroxylated vitamin D metabolites in two steps. After acetonitrile precipitation of two 50 μL blood serum aliquots of each sample (step 1), the extracted samples were assayed by RIA method with 25(OH)D-specific antibodies and 125I-labelled 25(OH)D (Diasorin Corporation) as a tracer (step 2). The sample, antibodies and tracer were co-incubated for 90 min at 20–25 °C, and phase-separated using the secondary antibody-precipitating complex for additional 20 min incubation at 20–25 °C. Prior to centrifugation, an NSB/Addition Buffer was added to prevent non-specific binding. The samples were measured using a Packard COBRA Quantum Gamma Counter (Packard Instrument Company, Downers Grove, IL, USA) and concentrations calculated with the accompanying software. The inter- and intra-assay coefficients of variation were between 8.4 to 12.6%.

*1.2. Season-Specific Serum 25(OH)D Quartiles Cut-Offs*

Season-specific serum 25(OH)D quartiles (hereafter SQ1 to SQ4) were created for each season of blood collection as follows.

*Summer* (June–August): SQ1 (5–28 nmol/L), SQ2 (29–45 nmol/L), SQ3 (46–68 nmol/L) and SQ4 (≥ 69 nmol/L).

*Autumn* (September–November): SQ1 (8–30 nmol/L), SQ2 (31–43 nmol/L), SQ3 (44–61 nmol/L), and SQ4 (≥ 62 nmol/L).

*Winter* (December–February): SQ1 (6–22 nmol/L), SQ2 (23–32 nmol/L), SQ3 (33–59 nmol/L), and SQ4 (≥ 60 nmol/L).

*Spring* (March–May): SQ1 (5–17 nmol/L), SQ2 (18–26 nmol/L), SQ3 (27–46 nmol/L), and SQ4 (≥ 47 nmol/L).

**Table S1.** Characteristics of participants by season-specific 25(OH)D quartiles (summary) *.

| **Lowest Season-Specific 25(OH)D Quartile** | **Middle Season-Specific 25(OH)D Quartiles** | **Highest Season-Specific 25(OH)D Quartile** |
| --- | --- | --- |
| SQ1 | SQ2+SQ3 | SQ4 |
| *n* = 191 | *n* = 392 | *n* = 192 |
| Most likely not to take any kind of supplements. | The least likely to be depressed. | Most likely to be women. |
| The least likely to drink alcohol. | The most physically active. | Most likely to take prescribed medication with |
| About 60% increased risk of prevalent global |  | vitamin D. |
| cognitive impairment and slower attention |  | Most likely to have osteoporosis. |
| reaction times compared with the middle 25(OH)D |  | The least likely to have cardiovascular diseases. |
| group. |  | 37% increased risk of 6-year mortality after |
|  |  | adjustment for sociodemographic and lifestyle |
|  |  | factors compared with the middle 25(OH)D group, |
|  |  | especially in women. |
|  |  | About 60% increased risk of prevalent global |
|  |  | cognitive impairment and slower attention |
|  |  | reaction times compared with the middle 25(OH)D |
|  |  | group. |

* Summarised from published results [22,23].

**Table S2.** Grip strength and Timed Up-and-Go test measurements by pre-defined 25(OH)D categories * over 5 years.

_________________________________________________________________________________________________________________________________________

**Measure / time of assessment** ***n*** **Lowest 25(OH)D** **Middle 25(OH)D** **Highest 25(OH)D**

_________________________________________________________________________________________________________________________________________

Pre-defined cut-offs* < 25 nmol/L 25–74 nmol/L ≥ 75 nmol/L

*n* (%) 191 (24.6) 469 (60.5) 115 (14.8)

*Grip strength, kg (SD)*

**All participants**

Baseline 754 16.40 (6.85) 18.89 (8.13) 15.73 (6.67)

1.5-year follow-up 582 15.85 (7.58) 18.18 (7.88) 14.40 (7.46)

3-year follow-up 434 15.27 (7.00) 17.45 (7.39) 14.50 (6.73)

5-year follow-up 286 12.58 (5.94) 15.79 (7.32) 14.43 (6.27)

**Men**

Baseline 301 22.93 (5.66) 25.22 (7.07) 23.75 (6.07)

1.5-year follow-up 224 23.42 (6.79) 24.32 (7.04) 22.09 (8.76)

3-year follow-up 163 21.98 (6.27) 23.28 (6.88) 22.72 (7.29)

5-year follow-up 104 17.34 (7.79) 21.83 (6.79) 21.68 (5.84)

**Women**

Baseline 453 12.73 (4.23) 13.75 (4.51) 12.92 (4.12)

1.5-year follow-up 358 12.07 (4.50) 13.38 (4.40) 11.96 (4.99)

3-year follow-up 271 11.91 (4.49) 13.26 (4.24) 12.09 (4.24)

5-year follow-up 182 10.74 (4.10) 11.68 (4.14) 12.01 (4.27)

*Timed Up-and-Go Test, s (SD)*

**All participants**

Baseline 717 20.81 (16.77) 16.77 (13.32) 21.87 (14.88)

1.5-year follow-up 529 23.50 (14.60) 19.63 (15.12) 23.75 (15.15)

3-year follow-up 389 25.33 (23.59) 19.13 (14.39) 26.51 (25.78)

5-year follow-up 266 25.44 (17.76) 19.56 (10.12) 19.90 (11.07)

**Men**

Baseline 287 18.11 (13.32) 15.21 (11.79) 17.91 (11.01)

1.5-year follow-up 210 23.82 (16.77) 17.44 (12.95) 19.36 (7.93)

3-year follow-up 149 21.62 (11.12) 16.82 (12.13) 32.97 (46.45)

5-year follow-up 94 18.71 (8.75) 17.65 (9.29) 17.96 (7.80)

**Women**

Baseline 430 22.31 (18.29) 18.03 (14.34) 23.32 (15.89)

1.5-year follow-up 319 23.33 (13.38) 21.37 (16.47) 25.29 (16.77)

3-year follow-up 240 27.12 (27.58) 20.82 (15.66) 24.23 (12.90)

5-year follow-up 172 27.26 (19.19) 20.82 (10.21) 20.67 (12.22)

______________________________________________________________________________________________________________________________

* < 25 nmol/L (severely deficient); ≥ 25 to < 50 nmol/L (deficient); 50 to 74 nmol/L (insufficient), and ≥ 75 nmol/L (sufficient) [5,10], with two middle category collapsed.

**Table S3.** β estimates of grip strength by pre-defined 25(OH)D * categories over 5 years.

| **Outcome** | **Effects/Variable** | **Model 1** |  | **Model 2** |  | **Model 3** |  |
| --- | --- | --- | --- | --- | --- | --- | --- |
|  |  | β (SE) † | *p* | β (SE) † | *p* Value | β (SE) † | *p* |
| *All participants* |  |  |  |  |  |  |  |
| GS (kg) | Intercept | 18.91 (0.35) | < 0.001 | 18.23 (0.75) | < 0.001 | 9.91 (0.87) | < 0.001 |
|  | Pre-defined 25(OH)D category |  |  |  |  |  |  |
|  | Lowest | −2.50 (0.63) | < 0.001 | −1.46 (0.64) | 0.02 | −0.53 (0.45) | 0.24 |
|  | Middle (ref) | 0 |  | 0 |  | 0 |  |
|  | Highest | −3.40 (0.78) | < 0.001 | −3.35 (0.86) | < 0.001 | −0.19 (0.54) | 0.72 |
| GS decline ‡ | Time | −0.79 (0.04) | < 0.001 | −0.65 (0.13) | < 0.001 | −0.46 (0.13) | 0.001 |
|  | Time2 |  |  | −0.03 (0.03) | 0.27 | −0.03 (0.03) | 0.3 |
| Rate of decline | Slope § |  |  |  |  |  |  |
|  | 25(OH)D category ×Time |  |  |  |  |  |  |
|  | Lowest × Time |  |  | 0.40 (0.25) | 0.11 | 0.25 (0.25) | 0.32 |
|  | Middle × Time (ref) |  |  | 0 |  | 0 |  |
|  | Highest × Time |  |  | −0.04 (0.31) | 0.89 | −0.21 (0.32) | 0.51 |
|  | 25(OH)D category × Time2 |  |  |  |  |  |  |
|  | Lowest × Time2 |  |  | −0.11 (0.05) | 0.03 | −0.10 (0.05) | 0.06 |
|  | Middle × Time2 |  |  | 0 |  | 0 |  |
|  | Highest × Time2 |  |  | −0.001 (0.06) | 0.99 | −0.005 (0.06) | 0.94 |
| *Men* |  |  |  |  |  |  |  |
| GS (kg) | Intercept | 25.30 (0.47) | < 0.001 | 25.13 (1.04) | < 0.001 | 18.50 (1.71) | < 0.001 |
|  | Pre-defined 25(OH)D category |  |  |  |  |  |  |
|  | Lowest | −2.09 (0.93) | 0.03 | −2.39 (0.96) | 0.02 | −0.36 (0.92) | 0.70 |
|  | Middle (ref) | 0 |  | 0 |  | 0 |  |
|  | Highest | −2.28 (1.33) | 0.09 | −2.16 (1.38) | 0.12 | −0.77 (1.27) | 0.55 |
| GS decline ‡ | Time | −1.10 (0.08) | < 0.001 | −1.07 (0.22) | < 0.001 | −1.17 (0.22) | < 0.001 |
|  | Time2 |  |  | 0.01 (0.04) | 0.86 | 0.02 (0.04) | 0.57 |
| Rate of decline | Slope § |  |  |  |  |  |  |
|  | 25(OH)D category × Time |  |  |  |  |  |  |
|  | Lowest × Time |  |  | 1.55 (0.47) | 0.001 | 1.23 (0.48) | 0.01 |
|  | Middle × Time (ref) |  |  | 0 |  | 0 |  |
|  | Highest × Time |  |  | −0.19 (0.68) | 0.78 | −0.46 (0.70) | 0.51 |
|  | 25(OH)D category × Time2 |  |  |  |  |  |  |
|  | Lowest × Time2 |  |  | −0.46 (0.10) | < 0.001 | −0.42 (0.10) | < 0.001 |
|  | Middle × Time2 |  |  | 0 |  | 0 |  |
|  | Highest × Time2 |  |  | -0.004 (0.14) | 0.98 | 0.04 (0.14) | 0.79 |
| *Women* |  |  |  |  |  |  |  |
| GS (kg) | Intercept | 13.83 (0.27) | < 0.001 | 12.73 (0.56) | < 0.001 | 11.47 (0.86) | < 0.001 |
|  | Pre-defined 25(OH)D category |  |  |  |  |  |  |
|  | Lowest | −1.14 (0.46) | 0.01 | −1.09 (0.50) | 0.03 | −0.59 (0.47) | 0.21 |
|  | Middle (ref) | 0 |  | 0 |  | 0 |  |
|  | Highest | −1.04 (0.53) | 0.05 | −1.11 (0.57) | 0.053 | −0.33 (0.52) | 0.53 |
| GS decline ‡ | Time | −0.59 (0.05) | < 0.001 | −0.25 (0.15) | 0.1 | −0.32 (0.15) | 0.04 |
|  | Time2 |  |  | −0.07 (0.03) | 0.02 | −0.06 (0.03) | 0.04 |
| Rate of decline | Slope § |  |  |  |  |  |  |
|  | 25(OH)D category × Time |  |  |  |  |  |  |
|  | Lowest × Time |  |  | -0.21 (0.28) | 0.44 | −0.20 (0.28) | 0.47 |
|  | Middle × Time |  |  | 0 |  | 0 |  |
|  | Highest × Time |  |  | 0.24 (0.33) | 0.46 | −0.24 (0.33) | 0.48 |
|  | 25(OH)D category x Time2 |  |  |  |  |  |  |
|  | Lowest × Time2 |  |  | 0.05 (0.06) | 0.43 | 0.04 (0.06) | 0.46 |
|  | Middle × Time2 |  |  | 0 |  | 0 |  |
|  | Highest × Time2 |  |  | 0.03 (0.07) | 0.66 | 0.02 (0.07) | 0.73 |
| *Restricted cohort* |  |  |  |  |  |  |  |
| GS (kg) | Intercept | 19.61 (0.39) | < 0.001 | 19.28 (0.84) | < 0.001 | 9.81 (0.99) | < 0.001 |
|  | Pre-defined 25(OH)D category |  |  |  |  |  |  |
|  | Lowest | −3.12 (0.66) | < 0.001 | −3.20 (0.72) | < 0.001 | −0.56 (0.48) | 0.25 |
|  | Middle (ref) | 0 |  | 0 |  | 0 |  |
|  | Highest | −0.69 (1.22) | 0.57 | −0.58 (0.93) | 0.66 | 0.36 (0.84) | 0.67 |
| GS decline ‡ | Time |  |  | −0.74 (0.14) | < 0.001 | −0.51 (0.15) | < 0.001 |
|  | Time2 |  |  | −0.02 (0.03) | 0.49 | −0.02 (0.03) | 0.56 |
| Rate of decline | Slope § |  |  |  |  |  |  |
|  | 25(OH)D category × Time |  |  |  |  |  |  |
|  | Lowest × Time |  |  | 0.48 (0.26) | 0.06 | 0.32 (0.26) | 0.22 |
|  | Middle × Time (ref) |  |  | 0 |  | 0 |  |
|  | Highest × Time |  |  | 0.06 (0.46) | 0.9 | 0.03 (0.47) | 0.95 |
|  | 25(OH)D category × Time2 |  |  |  |  |  |  |
|  | Lowest × Time2 |  |  | −0.12 (0.05) | 0.03 | −0.11 (0.05) | 0.04 |
|  | Middle × Time2 |  |  | 0 |  | 0 |  |
|  | Highest × Time2 |  |  | 0.03 (0.09) | 0.76 | −0.03 (0.09) | 0.76 |

* < 25 nmol/L (severely deficient); ≥ 25 to < 50 nmol/L (deficient); 50 to 74 nmol/L (insufficient), and ≥ 75 nmol/L (sufficient) [5,10], with two middle category collapsed. † β-coefficients (SE) are estimates of fixed effects with longitudinal GS data to evaluate population averages in GS. Fixed effects of covariates estimated initial level and trajectory differences in GS as a function of the covariate in the model. ‡ The main effect of time (Time and Time2) tested linear and non-linear (quadratic) change in GS over 5 years. § Interaction terms tested whether GS slopes varied by the covariate over 5 years. Model 1 includes a linear trend of time and pre-defined 25(OH)D categories. Model 2 is additionally adjusted for quadratic trend of time, interaction terms (Time × 25(OH)D categories, Time2 × 25(OH)D categories) and season of blood draw. Model 3 is further adjusted for sex, anthropometry (height and FFM), health-related variables (cognitive impairment, disease count, and self-rated health), physical activity, and interaction term (sex × Time).

**Table S4.** β estimates of Timed Up-and-Go test by pre-defined 25(OH)D* categories over 5 years.

| **Outcome** | **Effects/Variable** | **Model 1** |  | **Model 2** |  | **Model 3** |  |
| --- | --- | --- | --- | --- | --- | --- | --- |
|  |  | β (SE) † | *p* | β (SE) † | *p* | β (SE) † | *p* |
| *Entire cohort* |  |  |  |  |  |  |  |
| TUG (log10 s) | Intercept | 1.17 (0.01) | < 0.001 | 1.17 (0.02) | < 0.001 | 1.54 (0.03) | < 0.001 |
|  | Pre-defined 25(OH)D category |  |  |  |  |  |  |
|  | Lowest | 0.10 (0.02) | < 0.001 | 0.09 (0.02) | < 0.001 | 0.02 (0.02) | 0.25 |
|  | Middle (ref) | 0 |  | 0 |  | 0 |  |
|  | Highest | 0.10 (0.02) | < 0.001 | 0.11 (0.03) | < 0.001 | 0.04 (0.02) | 0.053 |
| TUG decline ‡ | Time | 0.03 (0.002) | < 0.001 | 0.06 (0.06) | < 0.001 | 0.06 (0.006) | < 0.001 |
|  | Time2 |  |  | −0.005 (0.001) | < 0.001 | −0.007 (0.001) | < 0.001 |
| Rate of decline | Slope § |  |  |  |  |  |  |
|  | 25(OH)D category × Time |  |  |  |  |  |  |
|  | Lowest × Time |  |  | 0.02 (0.01) | 0.08 | 0.02 (0.01) | 0.03 |
|  | Middle × Time (ref) |  |  | 0 |  | 0 |  |
|  | Highest × Time |  |  | 0.006 (0.01) | 0.7 | 0.01 (0.01) | 0.34 |
|  | 25(OH)D category x Time2 |  |  |  |  |  |  |
|  | Lowest × Time2 |  |  | −0.003 (0.002) | 0.15 | −0.004 (0.002) | 0.08 |
|  | Middle × Time2 |  |  | 0 |  | 0 |  |
|  | Highest × Time2 |  |  | −0.003 (0.003) | 0.4 | −0.004 (0.003) | 0.2 |
| *Men* |  |  |  |  |  |  |  |
| TUG (log10 s) | Intercept | 1.13 (0.02) | < 0.001 | 1.13 (0.03) | < 0.001 | 1.56 (0.05) | < 0.001 |
|  | Pre-defined 25(OH)D category |  |  |  |  |  |  |
|  | Lowest | 0.1 (0.03) | 0.001 | 0.08 (0.03) | 0.01 | −0.01 (0.03) | 0.65 |
|  | Middle (ref) | 0 |  | 0 |  | 0 |  |
|  | Highest | 0.08 (0.04) | 0.05 | 0.07 (0.04) | 0.13 | −0.02 (0.04) | 0.68 |
| TUG decline‡ | Time | 0.05 (0.003) |  | 0.05 (0.01) | < 0.001 | 0.05 (0.008) | < 0.001 |
|  | Time2 |  |  | −0.004 (0.002) | 0.01 | −0.006 (0.002) | < 0.001 |
| Rate of decline | Slope § |  |  |  |  |  |  |
|  | 25(OH)D category × Time |  |  |  |  |  |  |
|  | Lowest × Time |  |  | 0.06 (0.02) | 0.003 | 0.07 (0.02) | < 0.001 |
|  | Middle × Time (ref) |  |  | 0 |  | 0 |  |
|  | Highest × Time |  |  | 0.05 (0.02) | 0.06 | 0.05 (0.02) | 0.03 |
|  | 25(OH)D category × Time2 |  |  |  |  |  |  |
|  | Lowest × Time2 |  |  | −0.004 (0.001) | 0.01 | −0.01 (0.002) | < 0.001 |
|  | Middle × Time2 |  |  | 0 |  | 0 |  |
|  | Highest × Time2 |  |  | −0.01 (0.005) | 0.07 | −0.01 (0.005) | 0.04 |
| *Women* |  |  |  |  |  |  |  |
| TUG (log10 s) | Intercept | 1.20 (0.01) | < 0.001 | 1.21 (0.03) | < 0.001 | 1.50 (0.04) | < 0.001 |
|  | Pre-defined 25(OH)D category |  |  |  |  |  |  |
|  | Lowest | 0.08 (0.03) | 0.001 | 0.08 (0.03 ) | 0.004 | 0.04 (0.02) | 0.08 |
|  | Middle (ref) | 0 |  | 0 |  | 0 |  |
|  | Highest | 0.09 (0.03) | 0.003 | 0.1 (0.03) | 0.001 | 0.06 (0.02) | 0.02 |
| TUG decline‡ | Time | 0.03 (0.003) | < 0.001 | 0.06 (0.008) | < 0.001 | 0.06 (0.008) | < 0.001 |
|  | Time2 |  |  | −0.006 (0.001) | < 0.001 | −0.008 (0.002) | < 0.001 |
| Rate of decline | Slope § |  |  |  |  |  |  |
|  | 25(OH)D category × Time |  |  |  |  |  |  |
|  | Lowest × Time |  |  | 0.08 (0.03) | 0.004 | −0.00003 (0.002) | 1.0 |
|  | Middle × Time |  |  | 0 |  | 0 |  |
|  | Highest × Time |  |  | 0.1 (0.03) | 0.001 | −0.003 (0.02) | 0.87 |
|  | 25(OH)D category × Time2 |  |  |  |  |  |  |
|  | Lowest × Time2 |  |  | −0.0003 (0.003) | 0.92 | −0.0002 (0.003) | 0.95 |
|  | Middle × Time2 |  |  | 0 |  | 0 |  |
|  | Highest × Time2 |  |  | 0.0002 (0.004) | 0.96 | −0.001 (0.004) | 0.74 |
| *Restricted cohort* |  |  |  |  |  |  |  |
| TUG (log10 s) | Intercept | 1.16 (0.01) | < 0.001 | 1.15 (0.02) | < 0.001 | 1.54 (0.0.03) | < 0.001 |
|  | Pre-defined 25(OH)D category |  |  |  |  |  |  |
|  | Lowest | 0.11 (0.02) | < 0.001 | 0.1 (0.02) | < 0.001 | 0.02 (0.02) | 0.13 |
|  | Middle (ref) | 0 |  | 0 |  | 0 |  |
|  | Highest | 0.001 (0.03) | 0.98 | −0.005 (0.04) | 0.89 | −0.01 (0.03) | 0.61 |
| TUG decline ‡ | Time | 0.03 (0.002) | < 0.001 | 0.06 (0.006) | < 0.001 | 0.06 (0.006) | < 0.001 |
|  | Time2 |  |  | −0.005 (0.001) | < 0.001 | −0.007 (0.001) | < 0.001 |
| Rate of decline | Slope § |  |  |  |  |  |  |
|  | 25(OH)D category × Time |  |  |  |  |  |  |
|  | Lowest × Time |  |  | 0.02 (0.01) | 0.09 | 0.02 (0.01) | 0.05 |
|  | Middle × Time (ref) |  |  | 0 |  | 0 |  |
|  | Highest × Time |  |  | 0.02 (0.02) | 0.38 | 0.02 (0.02) | 0.42 |
|  | 25(OH)D category × Time2 |  |  |  |  |  |  |
|  | Lowest × Time2 |  |  | −0.003 (0.002) | 0.15 | −0.004 (0.002) | 0.08 |
|  | Middle × Time2 |  |  | 0 |  | 0 |  |
|  | Highest × Time2 |  |  | −0.005 (0.004) | 0.23 | −0.005 (0.004) | 0.23 |

* < 25 nmol/L (severely deficient); ≥ 25 to < 50 nmol/L (deficient); 50 to 74 nmol/L (insufficient), and ≥ 75 nmol/L (sufficient) [5,10], with two middle category collapsed. † β-coefficients (SE) are estimates of fixed effects with longitudinal log10 transformed TUG data to evaluate population averages in TUG time. Fixed effects of covariates estimated initial level and trajectory differences in TUG as a function of the covariate in the model. ‡ The main effect of time (Time and Time2) tested linear and non-linear (quadratic) change in TUG over 5 years. § Interaction terms tested whether TUG slopes varied by the covariate over 5 years. Model 1 includes a linear trend of time and season-specific 25(OH)D categories. Model 2 is additionally adjusted for quadratic trend of time and interaction terms (Time × 25(OH)D categories, Time2 × 25(OH)D categories). Model 3 is further adjusted for sex, anthropometry (height and FFM), health-related variables (cognitive impairment, disease count, self-rated health), physical activity, use of walking aids during TUG testing (time-varying covariate) and interaction term (sex × Time).
